# Supplementary material for: Global analysis of uncapped mRNA changes under drought stress and microRNA-dependent endonucleolytic cleavages in foxtail millet
Source: PubMed Central journal article supplement (PMC4594888; doi:10.1186/s12870-015-0632-0), 2015-10-06

**Additional file 6: Gene transcript features to different mRNA decay patterns.** Analyzed GC content and MFEI value of mRNA, 5' UTR and 3' UTR for type-I, -II, -IV, randomly selected genes and all genes in foxtail millet. “R” represented randomly selected genes, “A” represented all genes, “\*\*\*” indicate statistically significant differences at  $P$  value < 0.001 (Student’s wilcox-test).

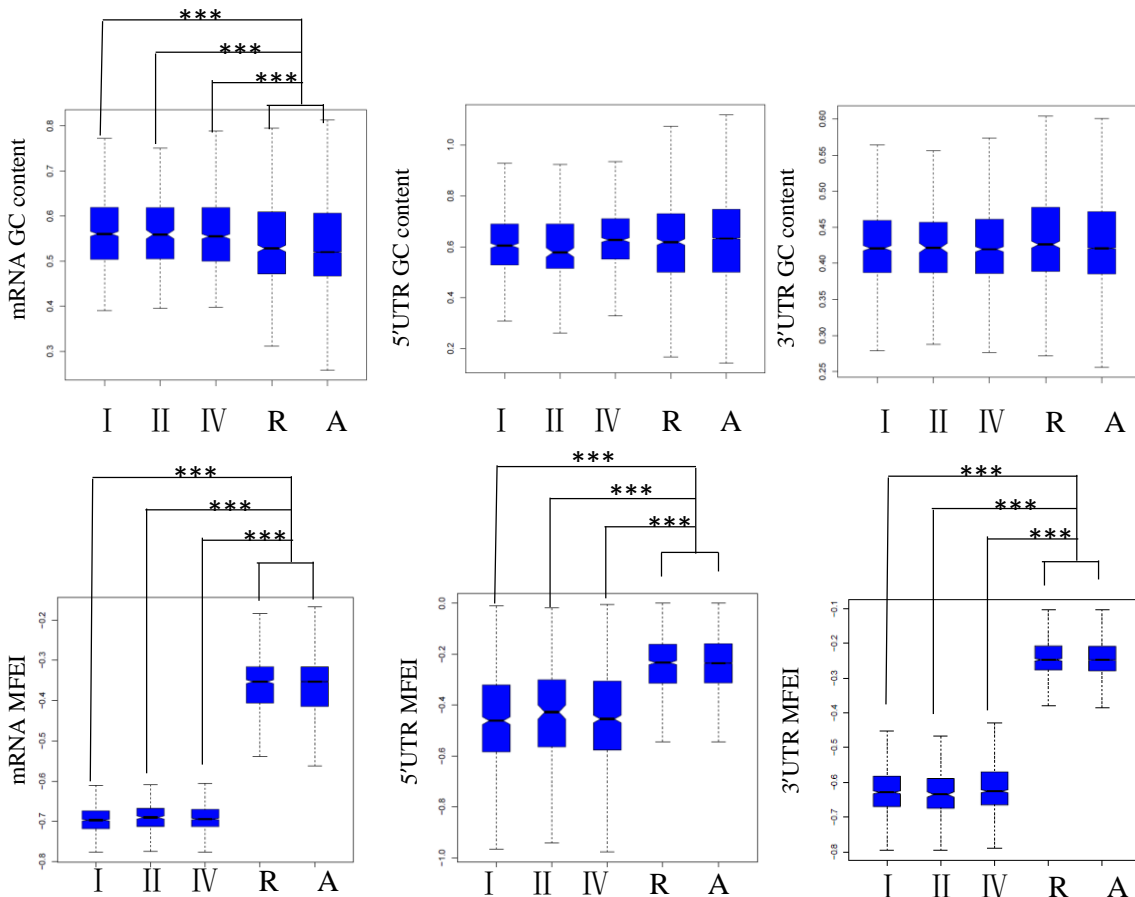

Supplement: 12870_2015_632_MOESM6_ESM.pdf [file 12870_2015_632_MOESM6_ESM.pdf]
